# Supplementary material for: Clinical Assessment of Injectable Flowable Composite with Giomer Based Technology Versus Smart Bioactive Restoration in Carious Class V Cavities: An 18 month Randomized Clinical Trial
Source: Research Square preprint supplement (doi:10.21203/rs.3.rs-6237005/v1), 2025-04-14
Supplement: Supplementary file 1 [file 6381ec3aafae24c5581259c5.docx]

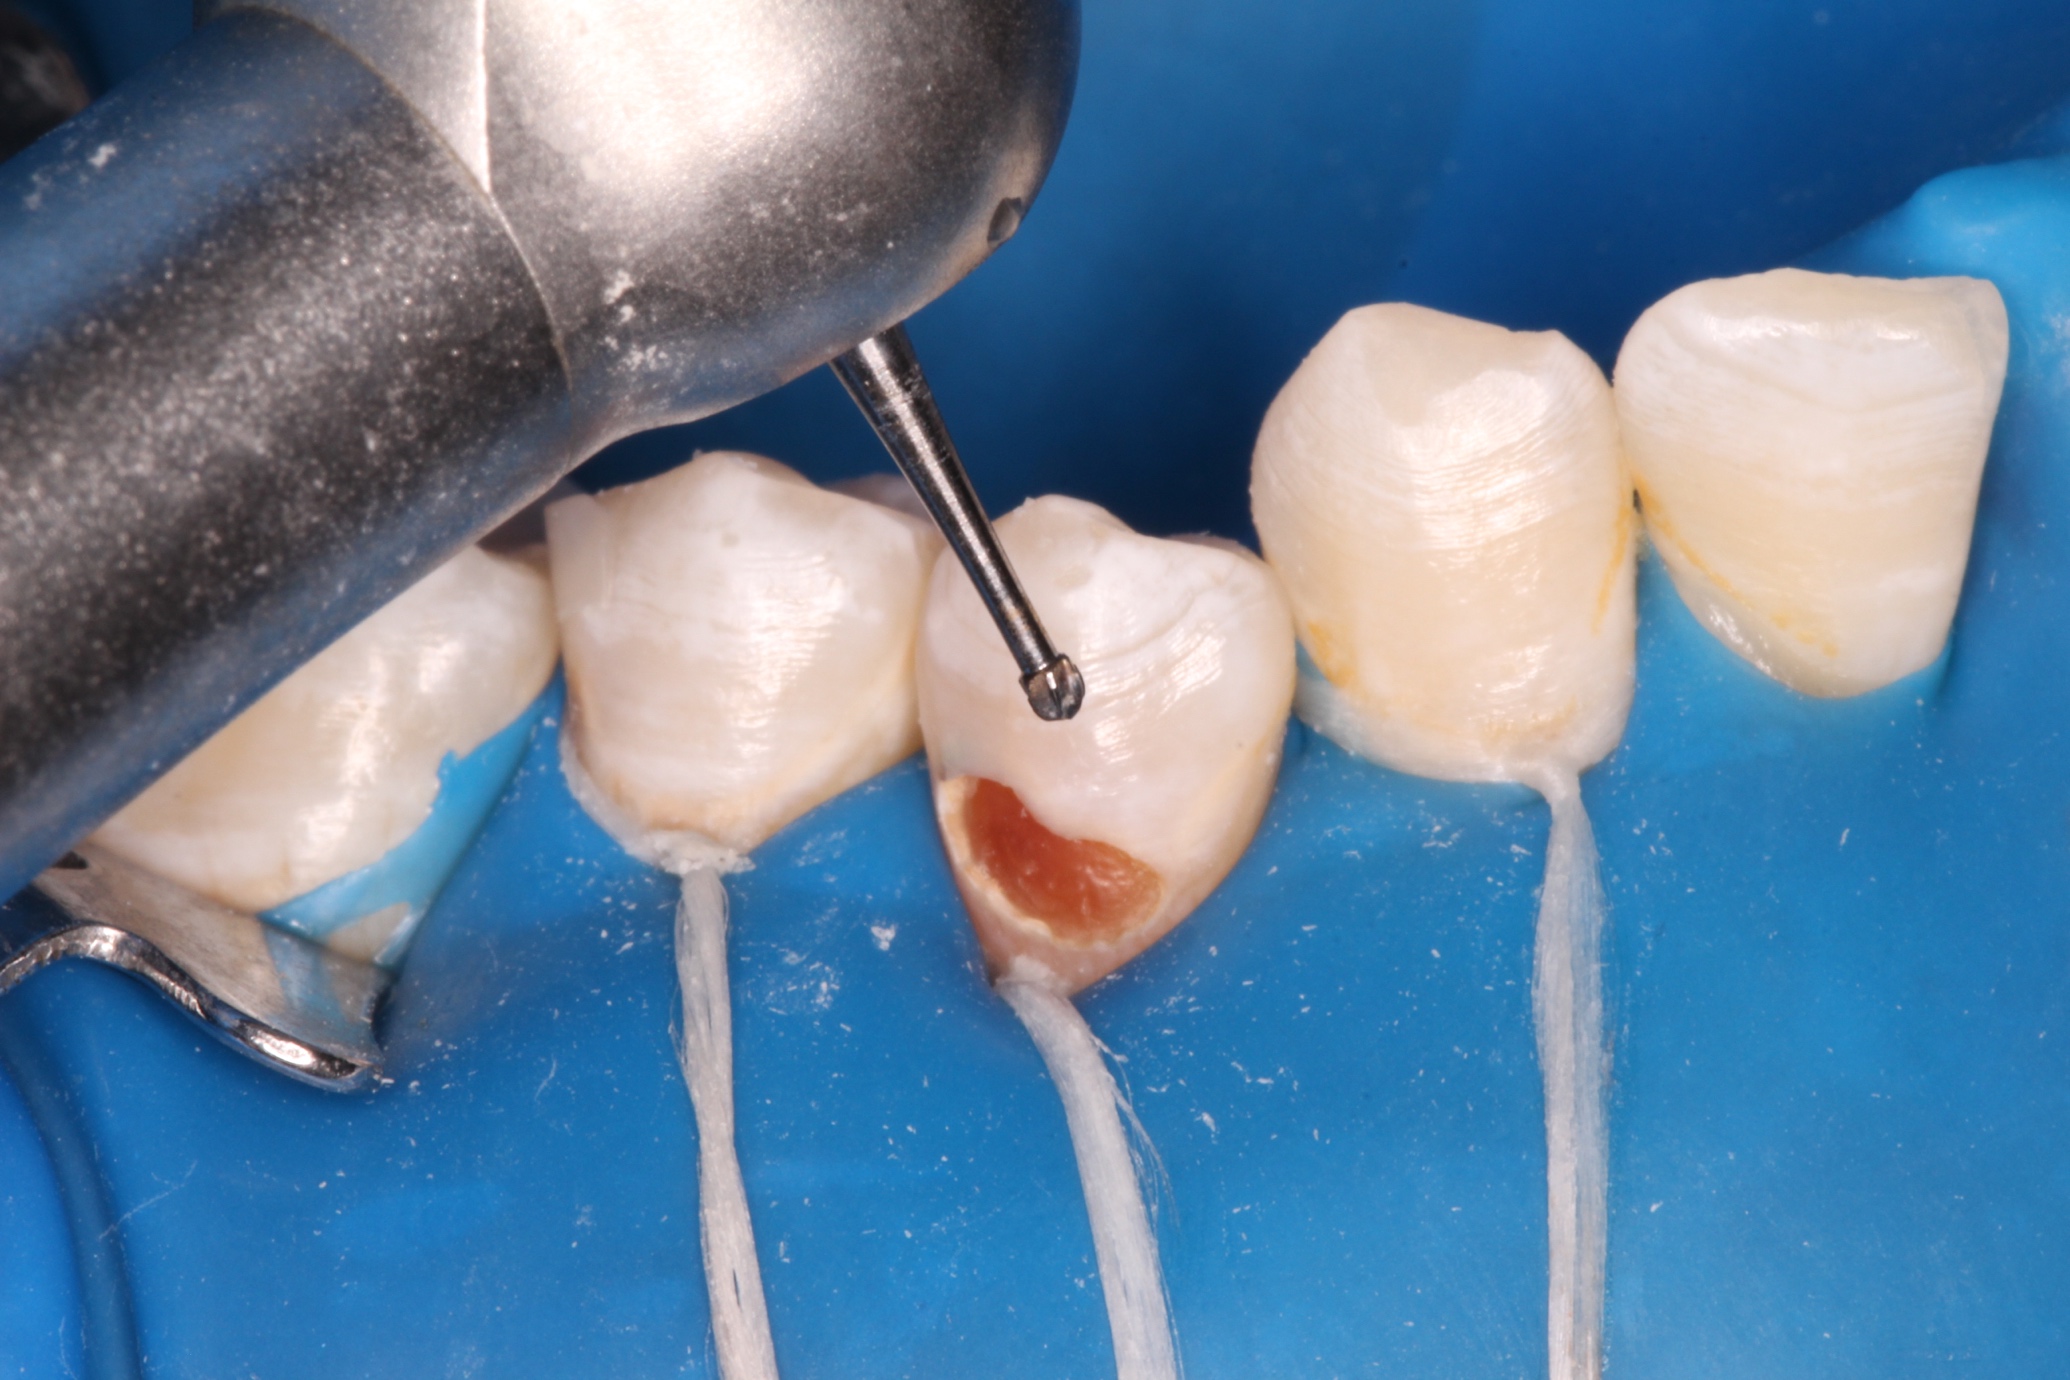
**Figure (1):** Tooth preparation. **A:** Cavity preparation using carbide round bur**, B:** Deep caries removal using spoon excavator**, C:** Bevel using yellow finishing stone

**A**

**B**

**Figure (1):** Tooth preparation. **A:** Cavity preparation using carbide round bur**, B:** Deep caries removal using spoon excavator**, C:** Bevel using yellow finishing
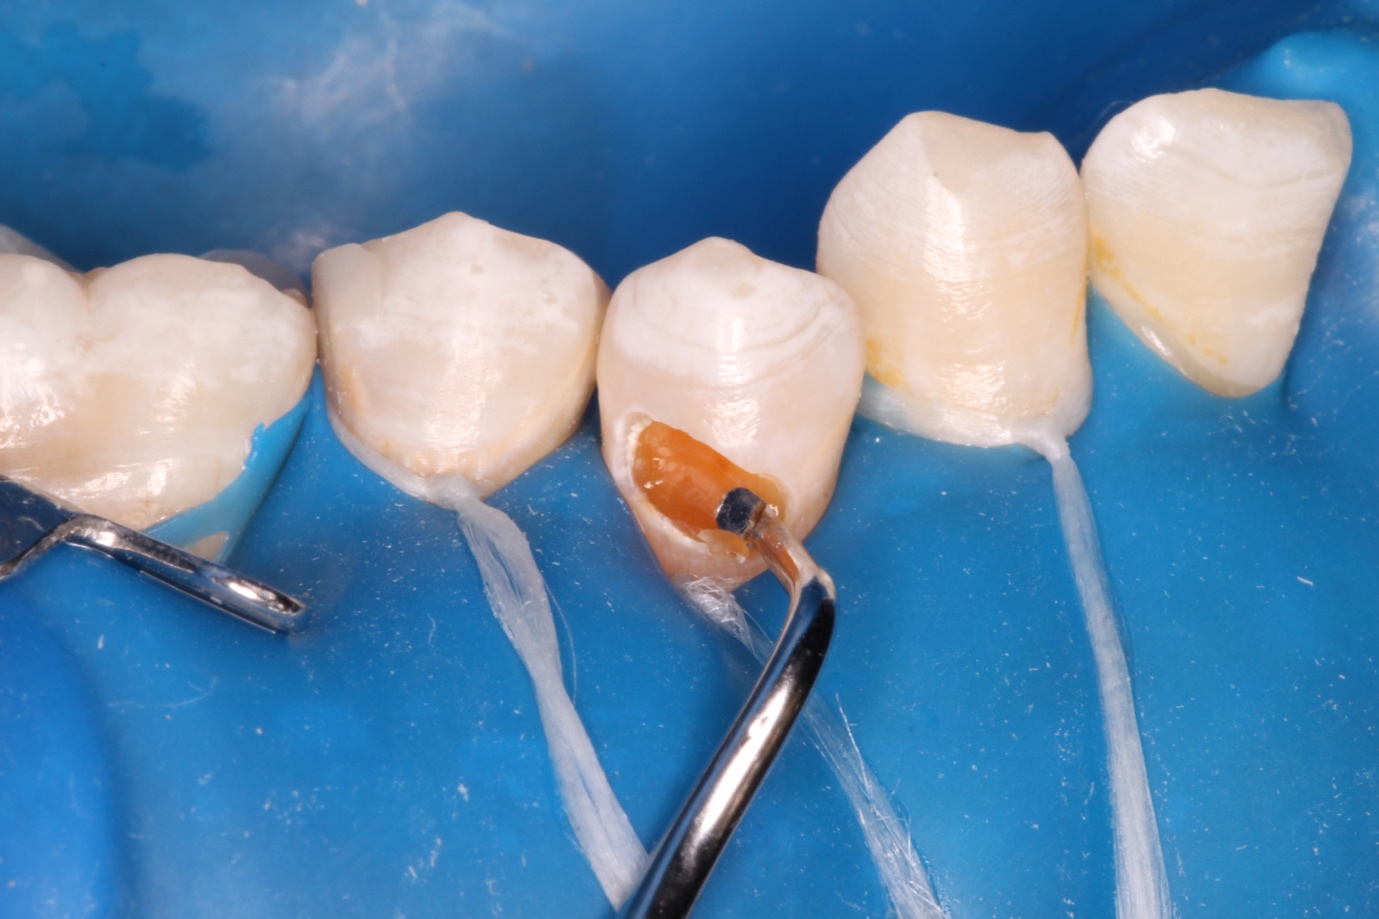
stone


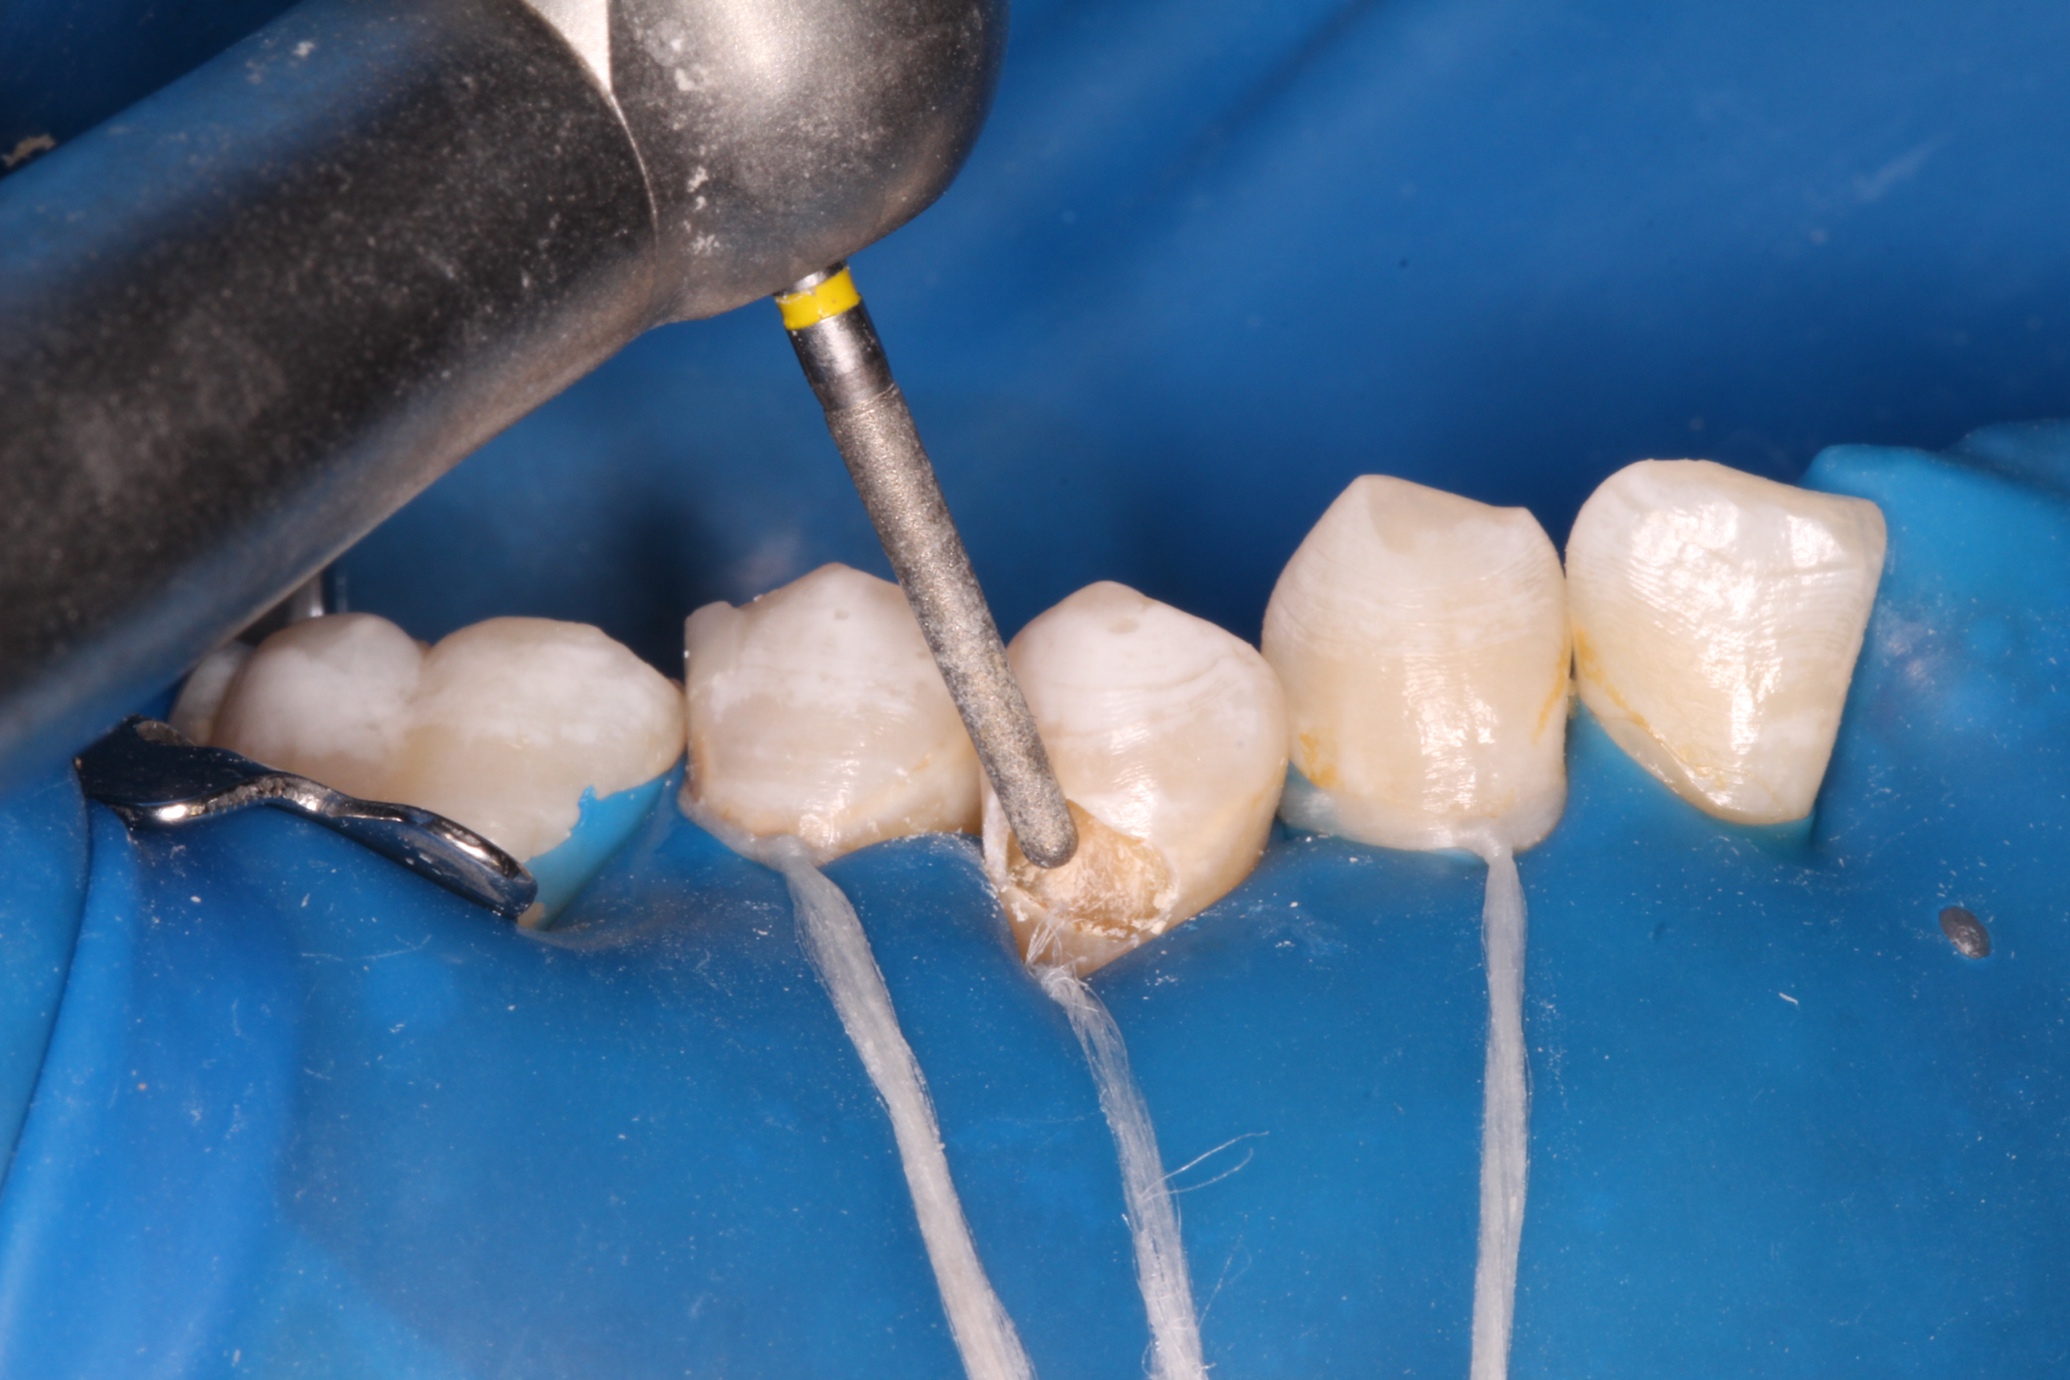
**Figure (1):** Tooth preparation. **A:** Cavity preparation using carbide round bur**, B:** Deep caries removal using spoon excavator**, C:** Bevel using yellow finishing stone

**C**


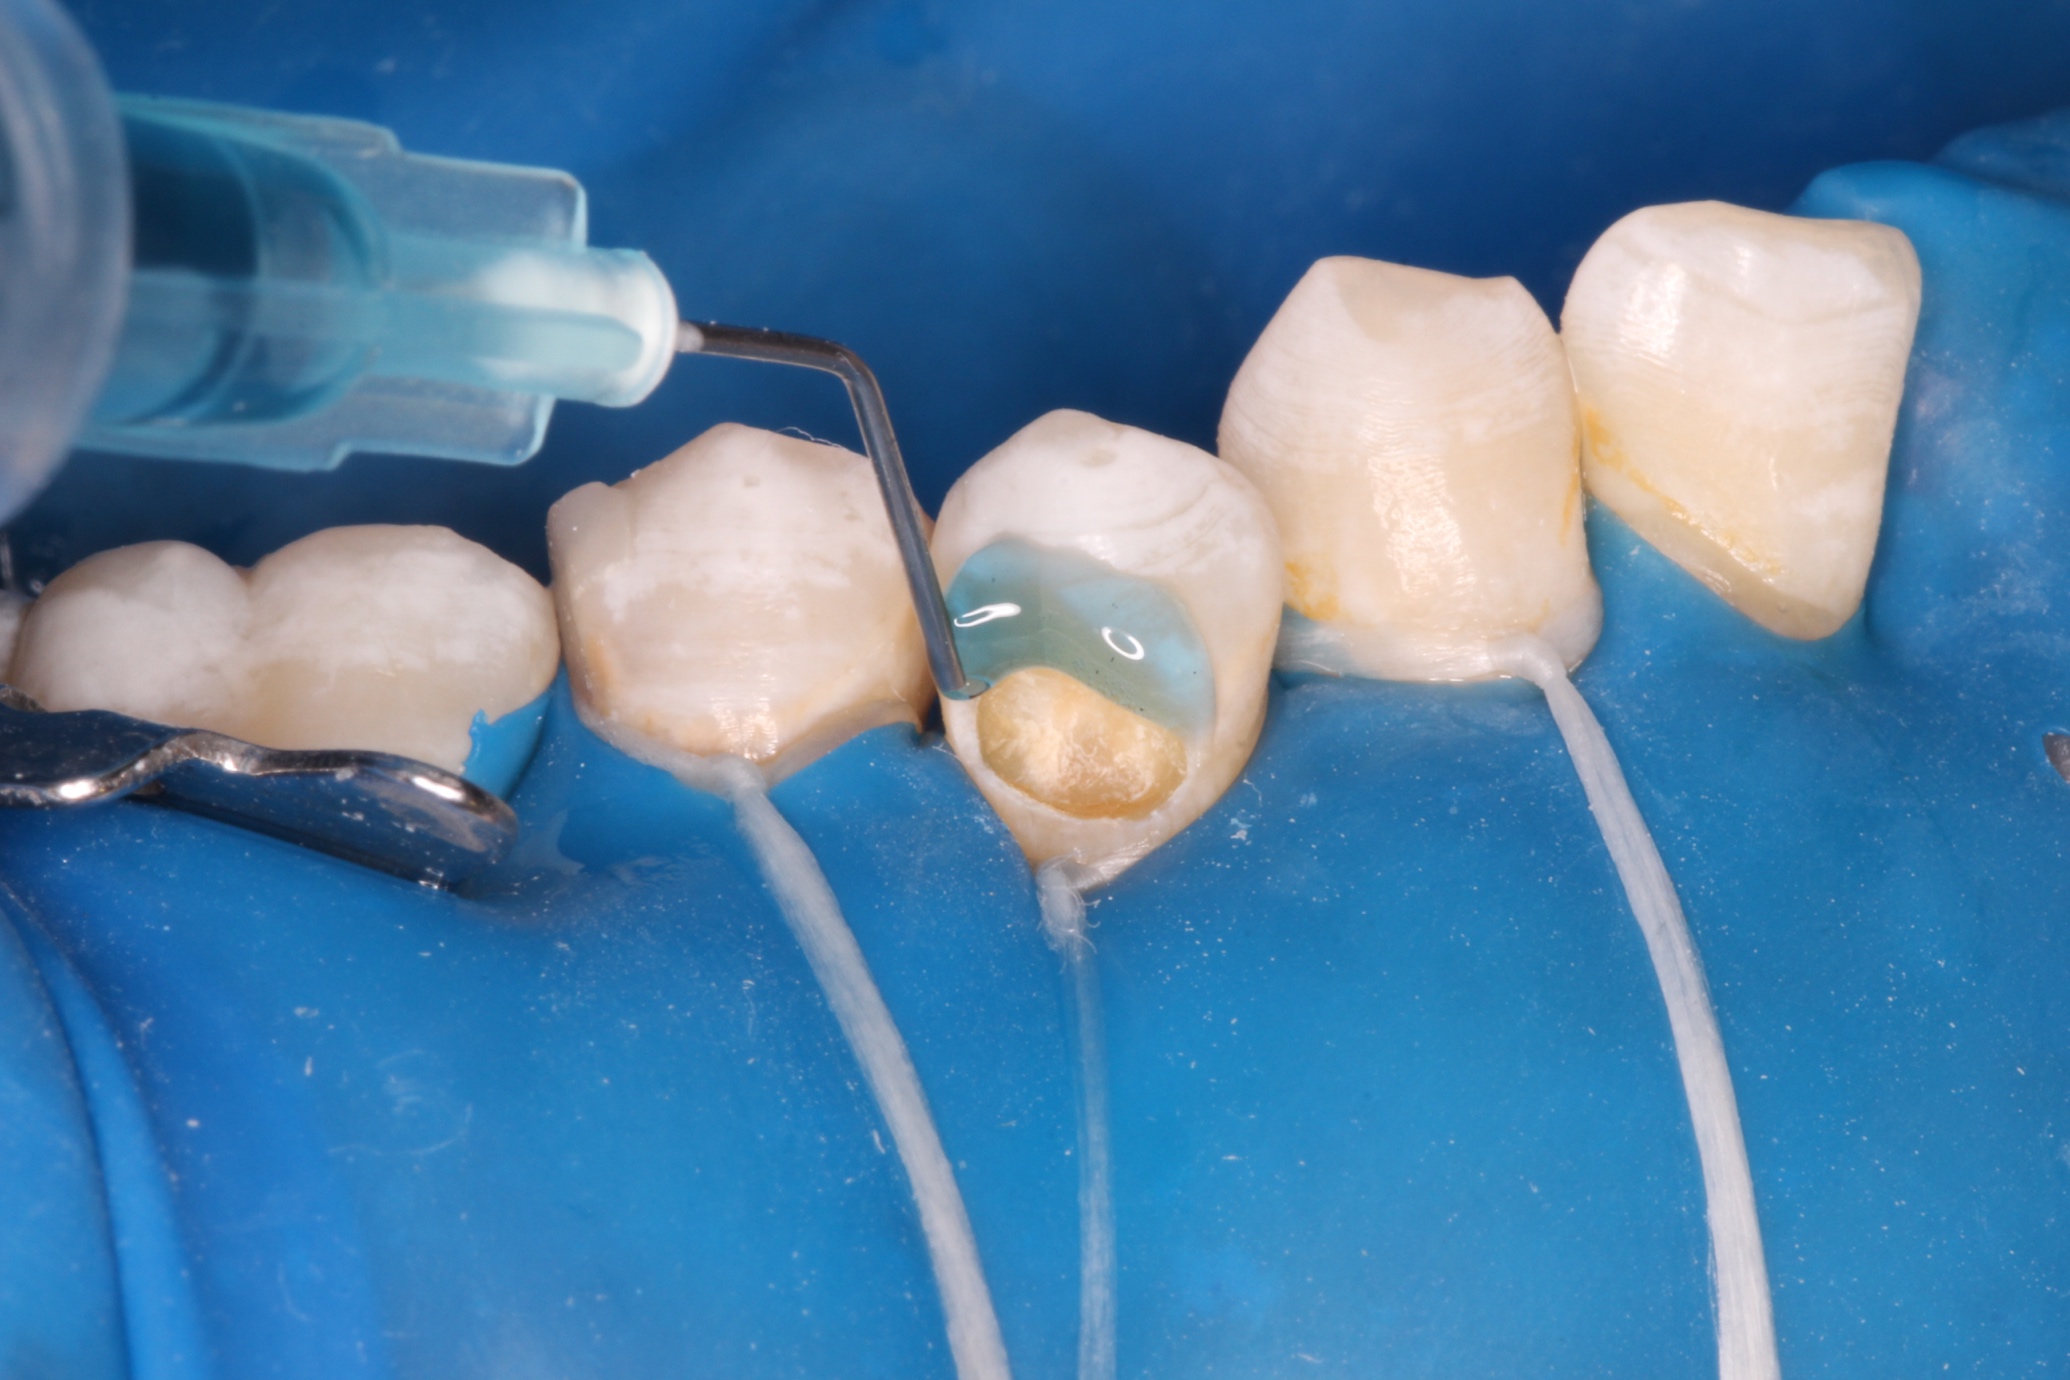
**Figure (2):** **A:** Selective etching **, B:** Single bond application

**A**

**B**


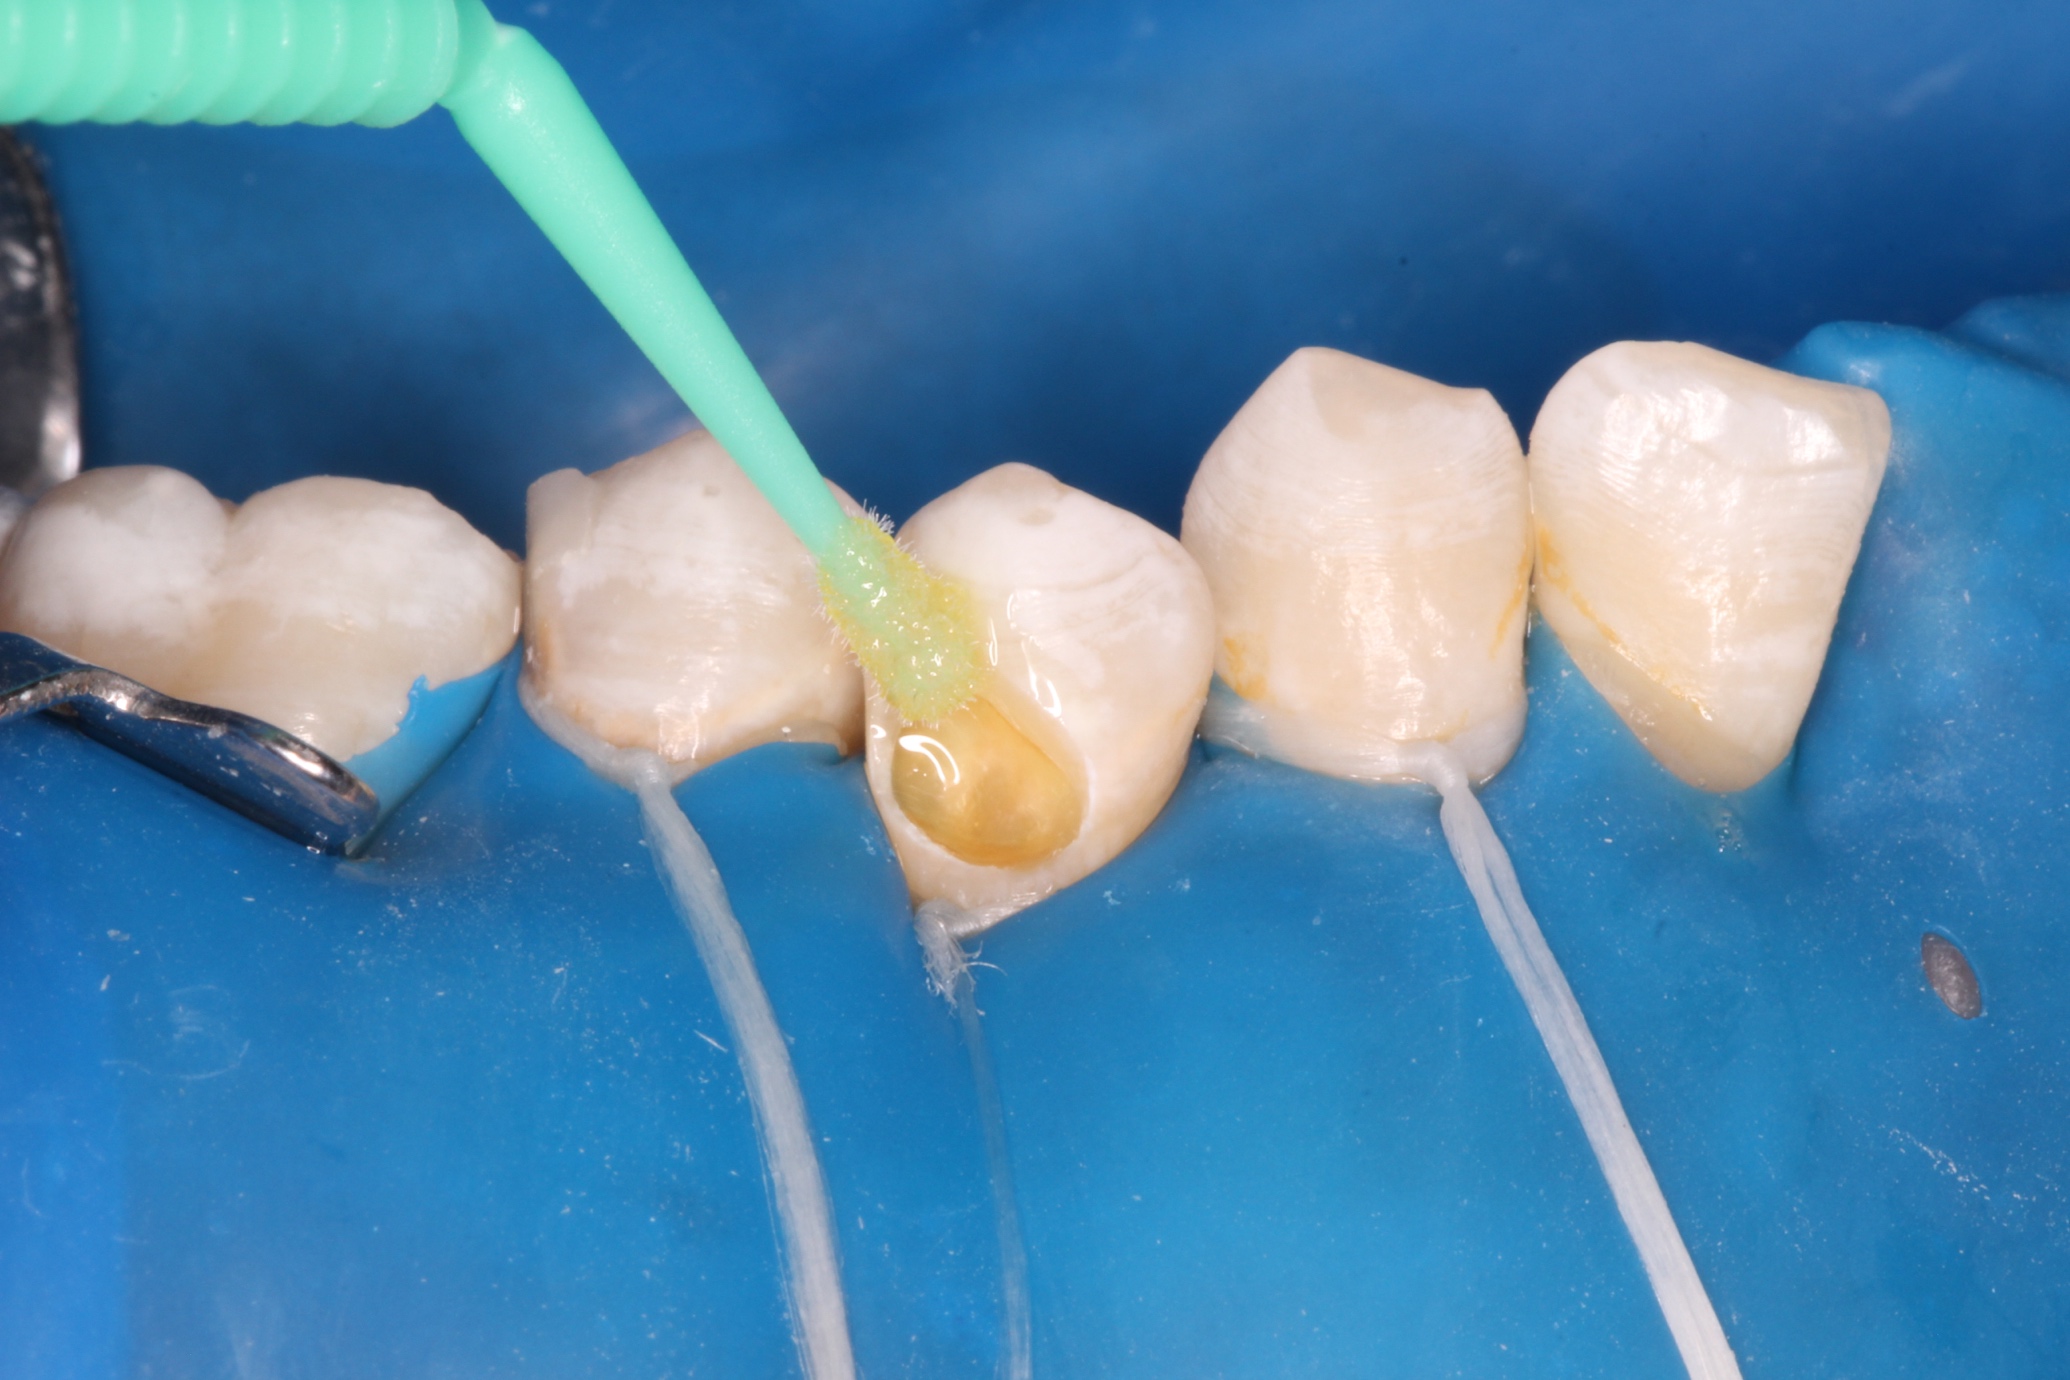
**Figure (2):** **A:** Selective etching **, B:** Single bond application


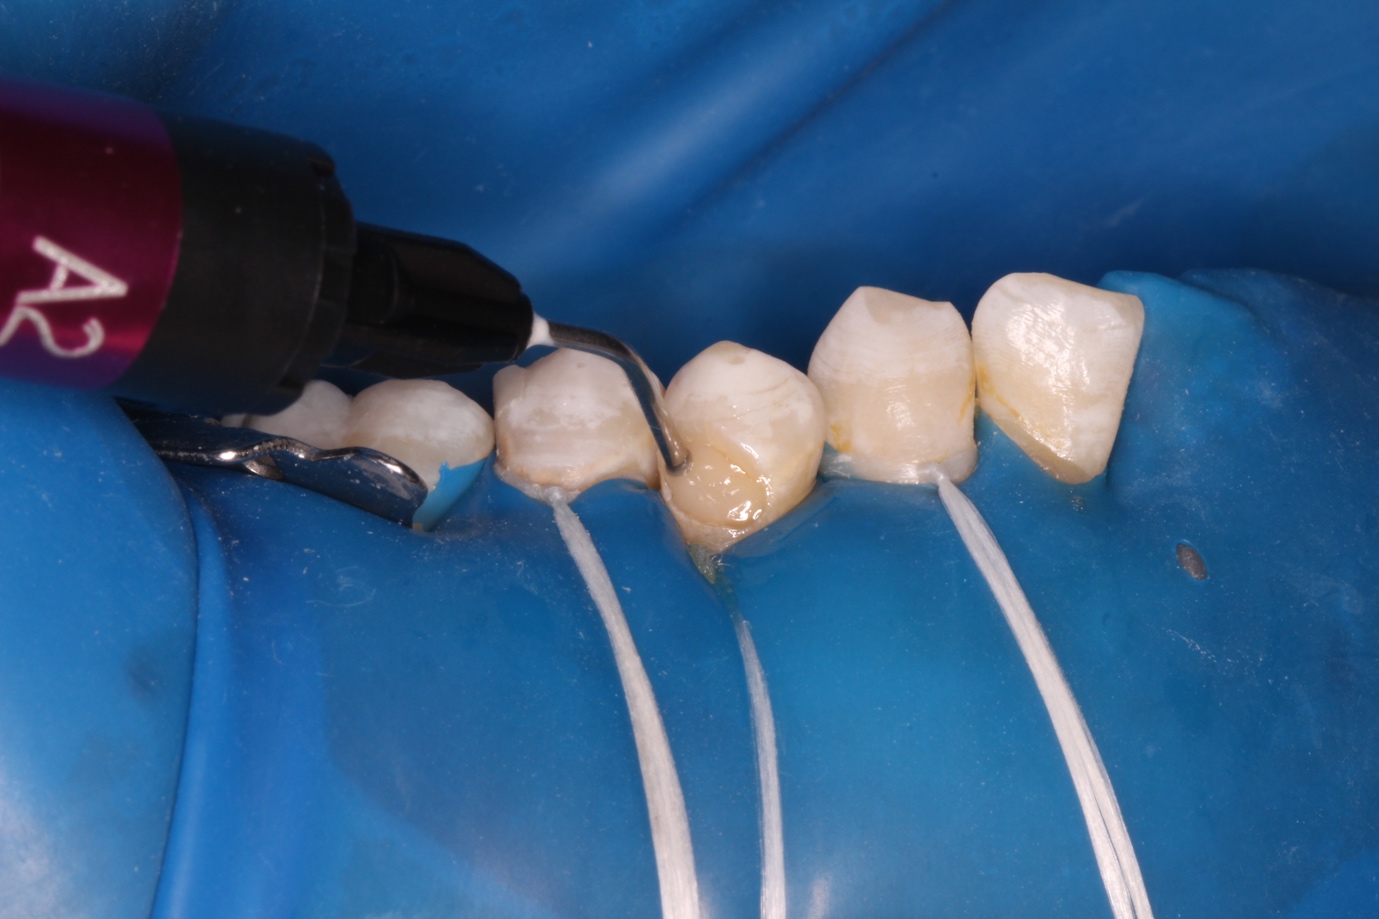


**Figure (3):** Beautifil flow x application


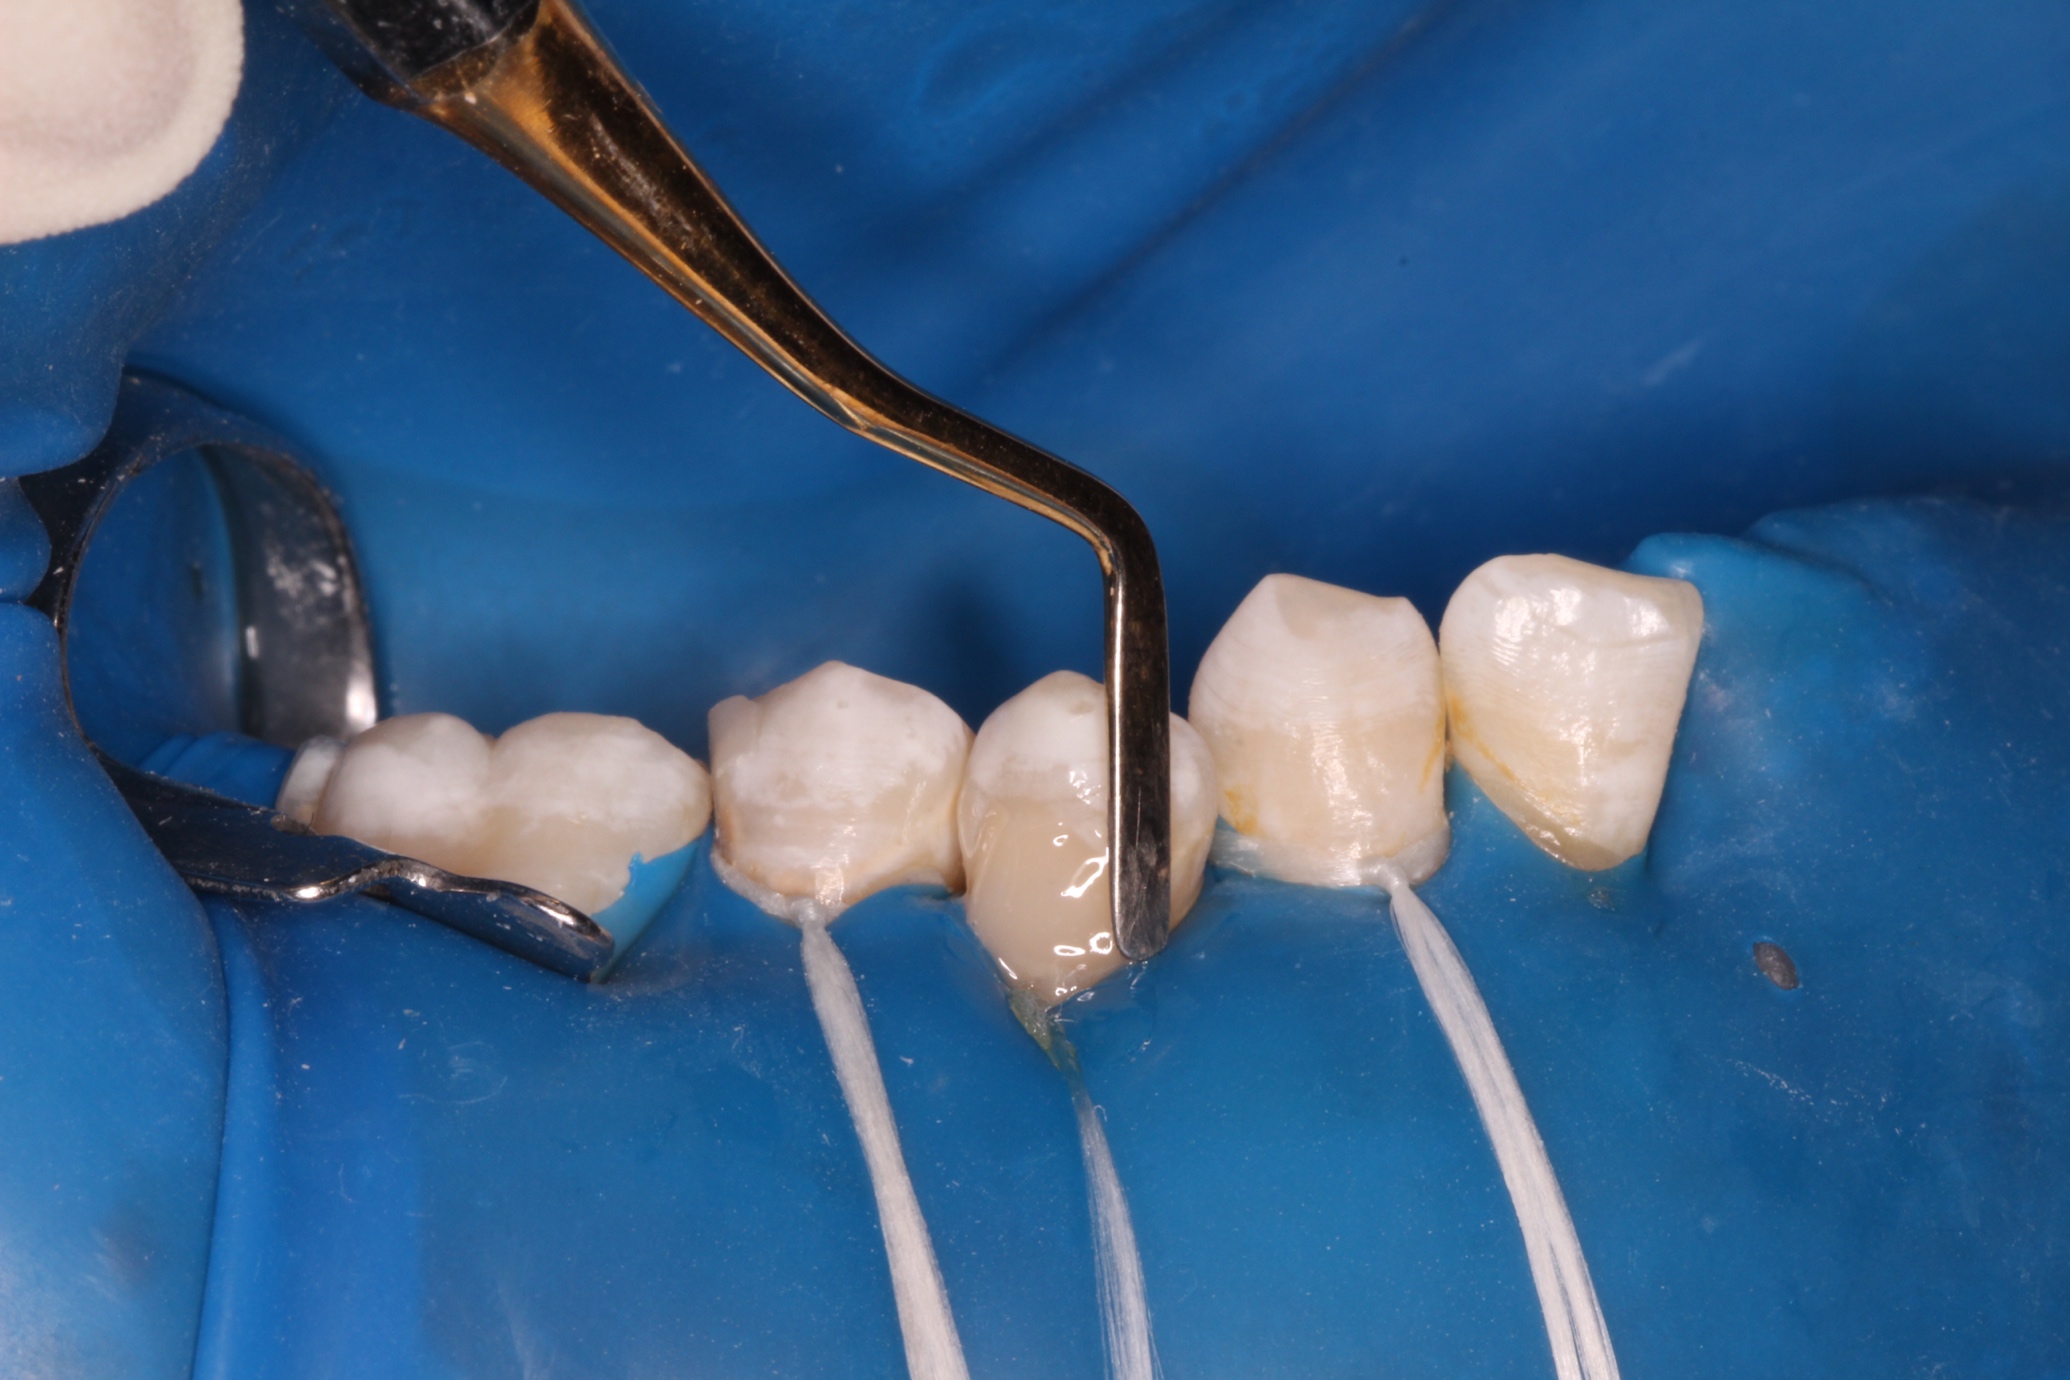


**Figure (3):** Beautifil flow x application


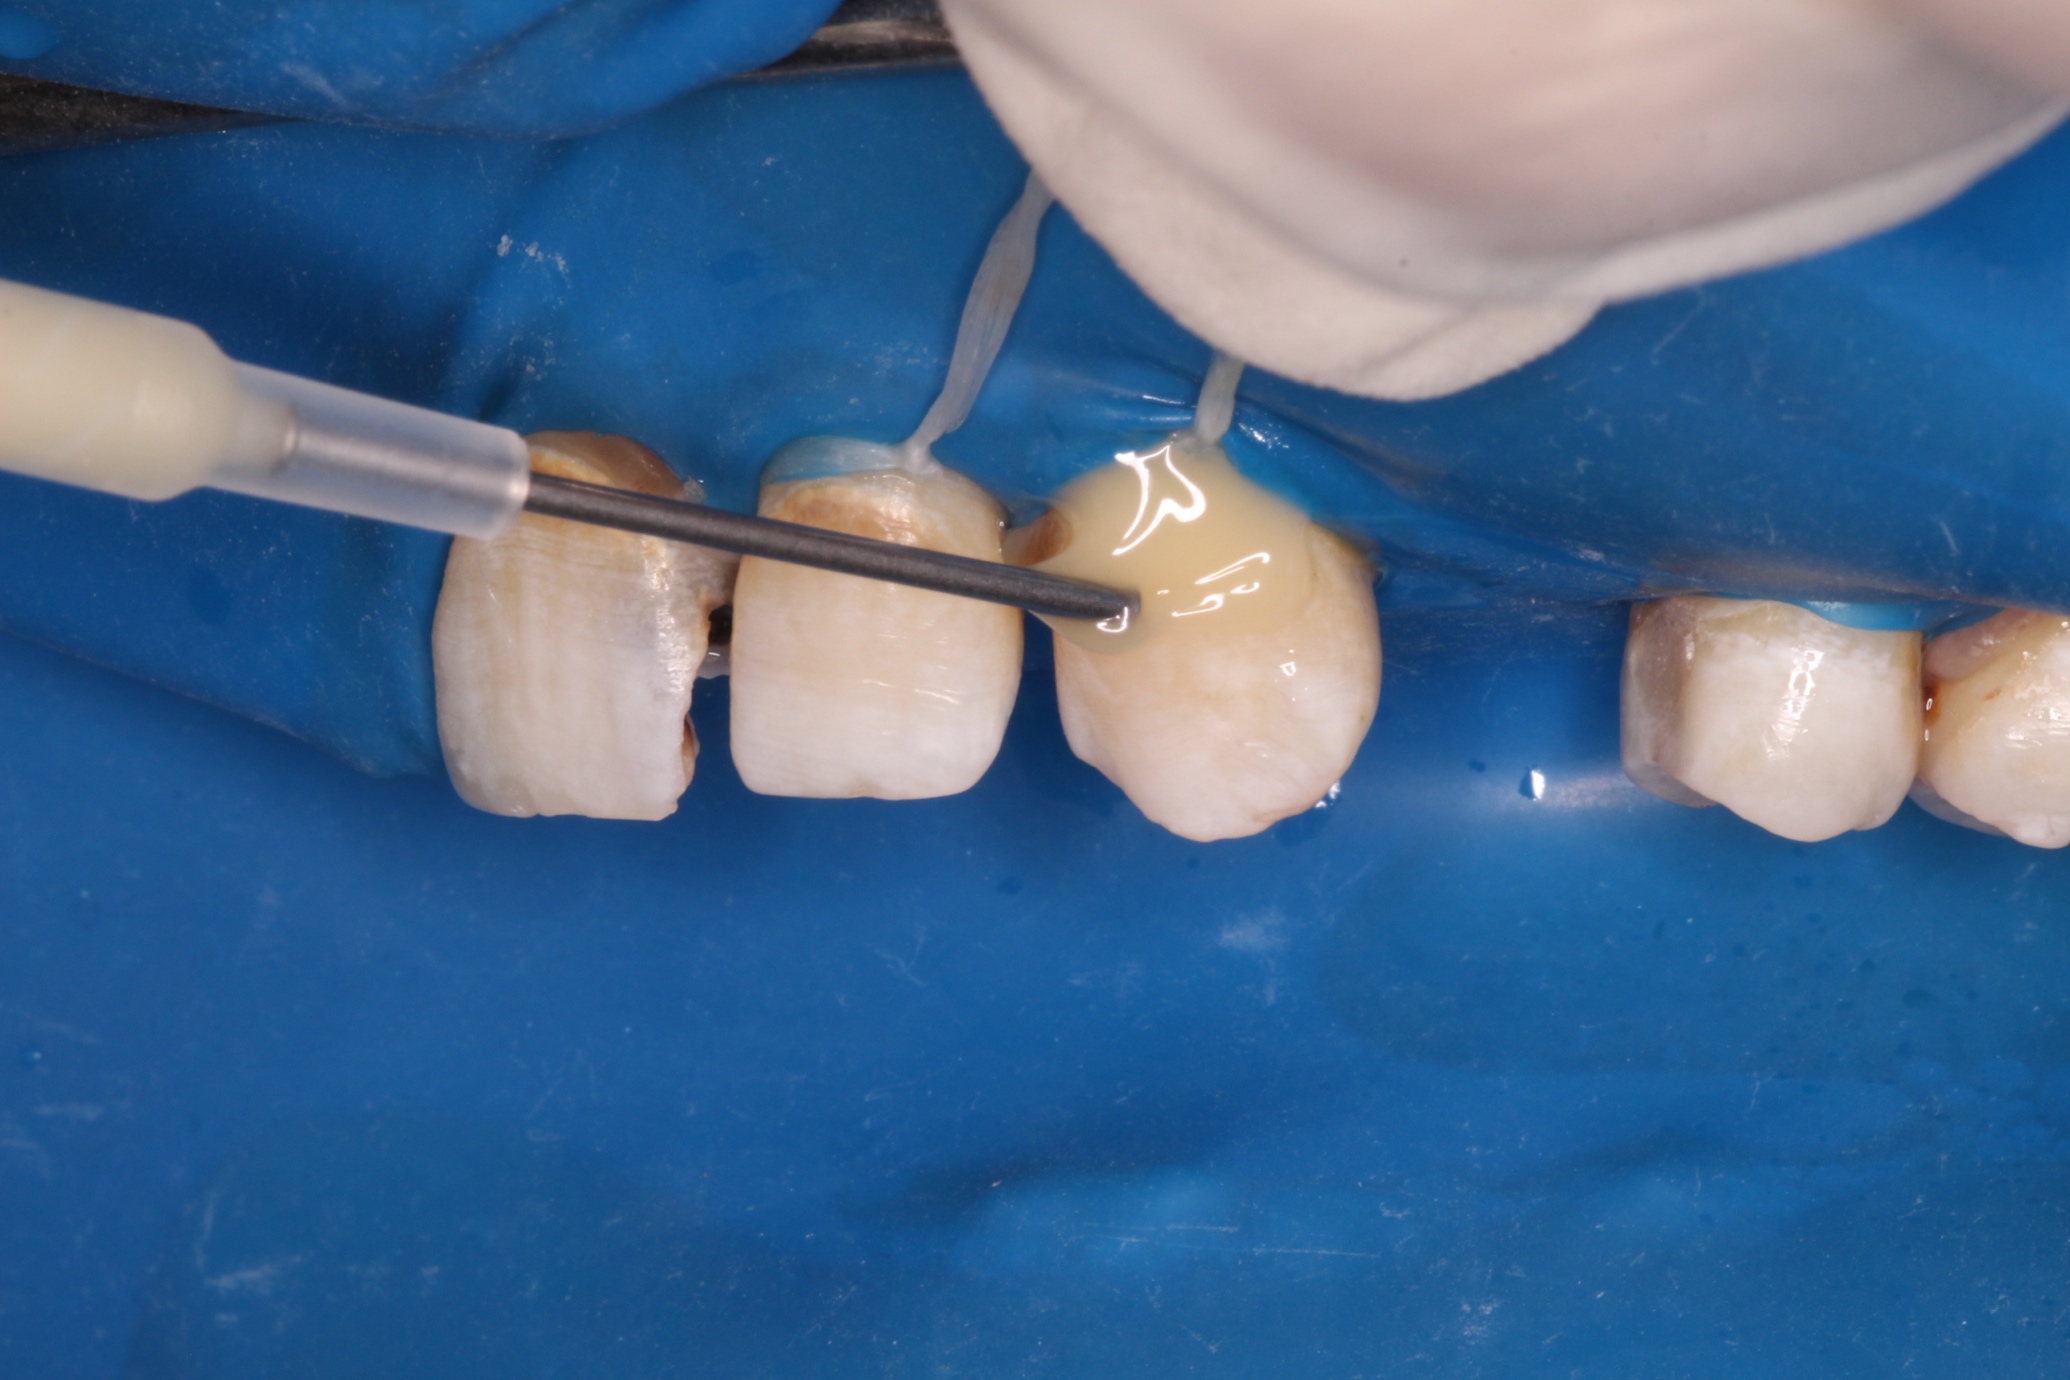


**Figure (4):** ACTIVA bioactive application


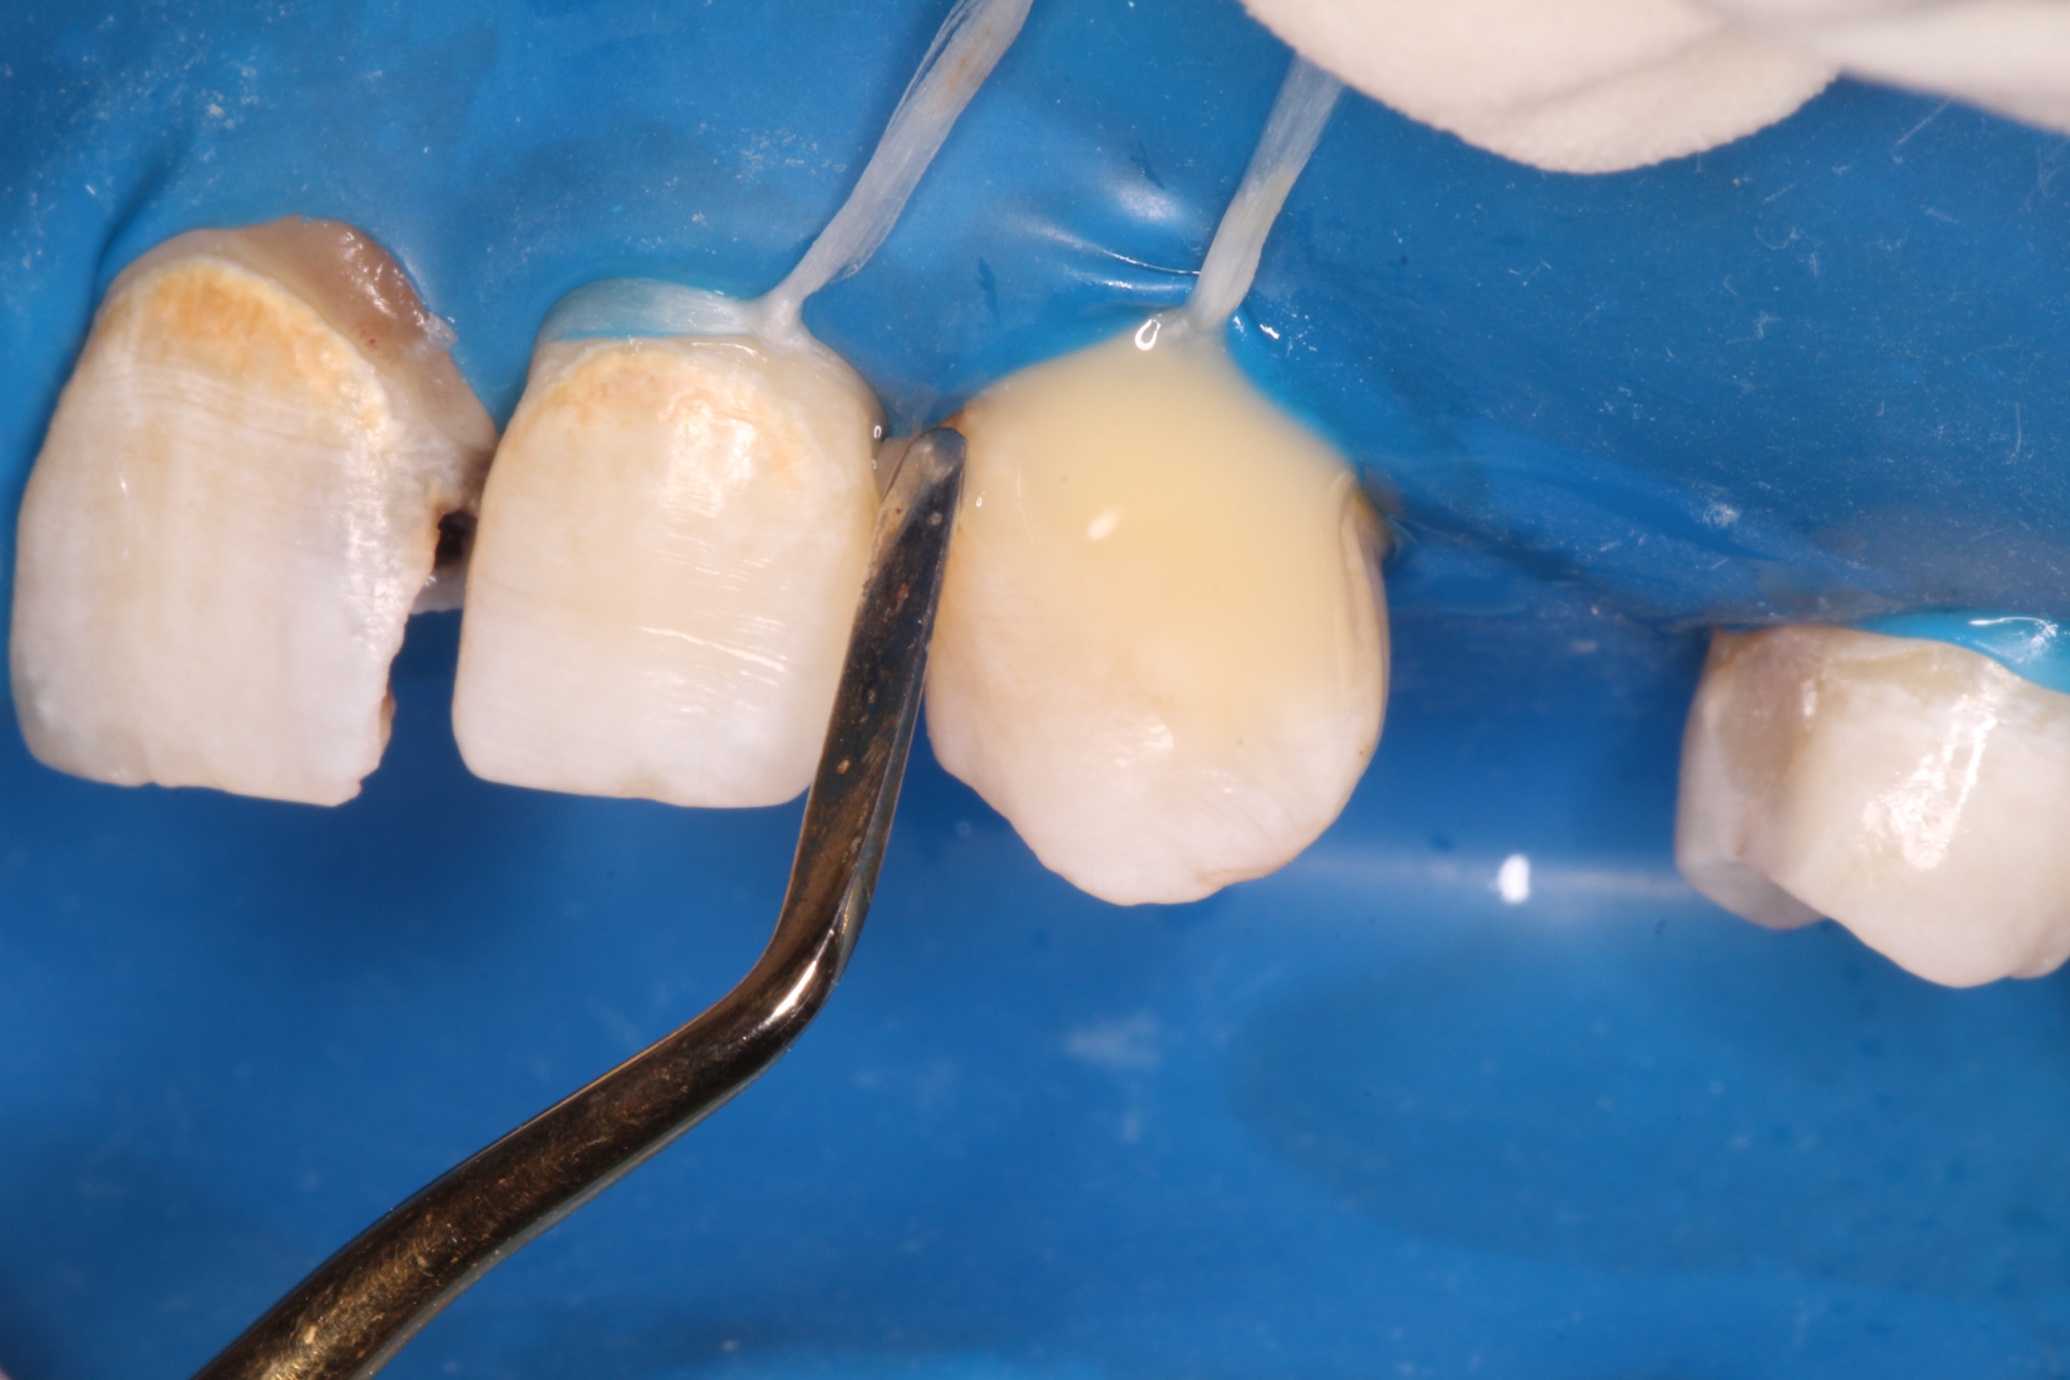
**Figure (4):** ACTIVA bioactive application


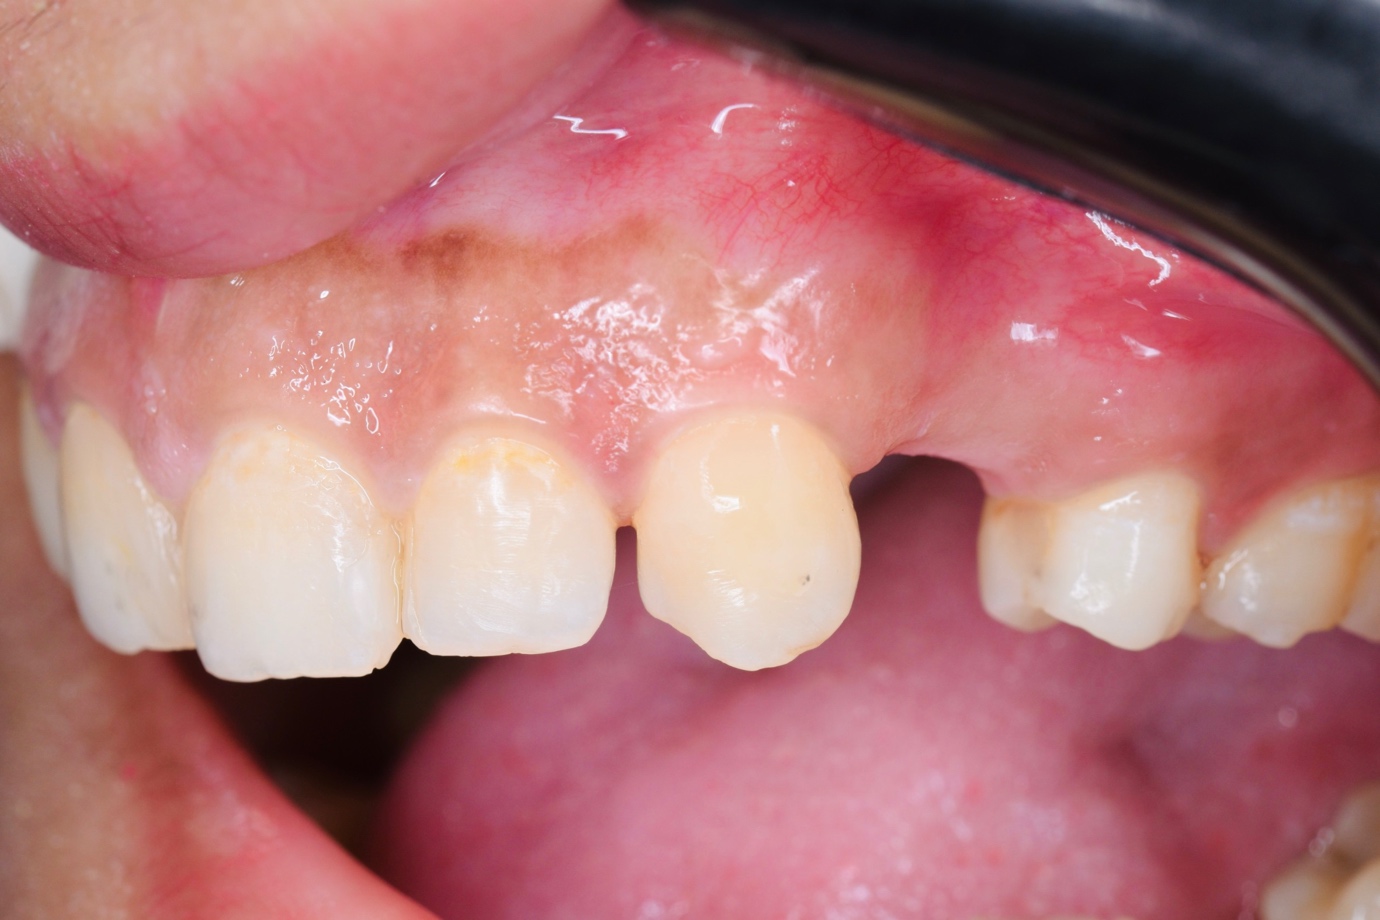

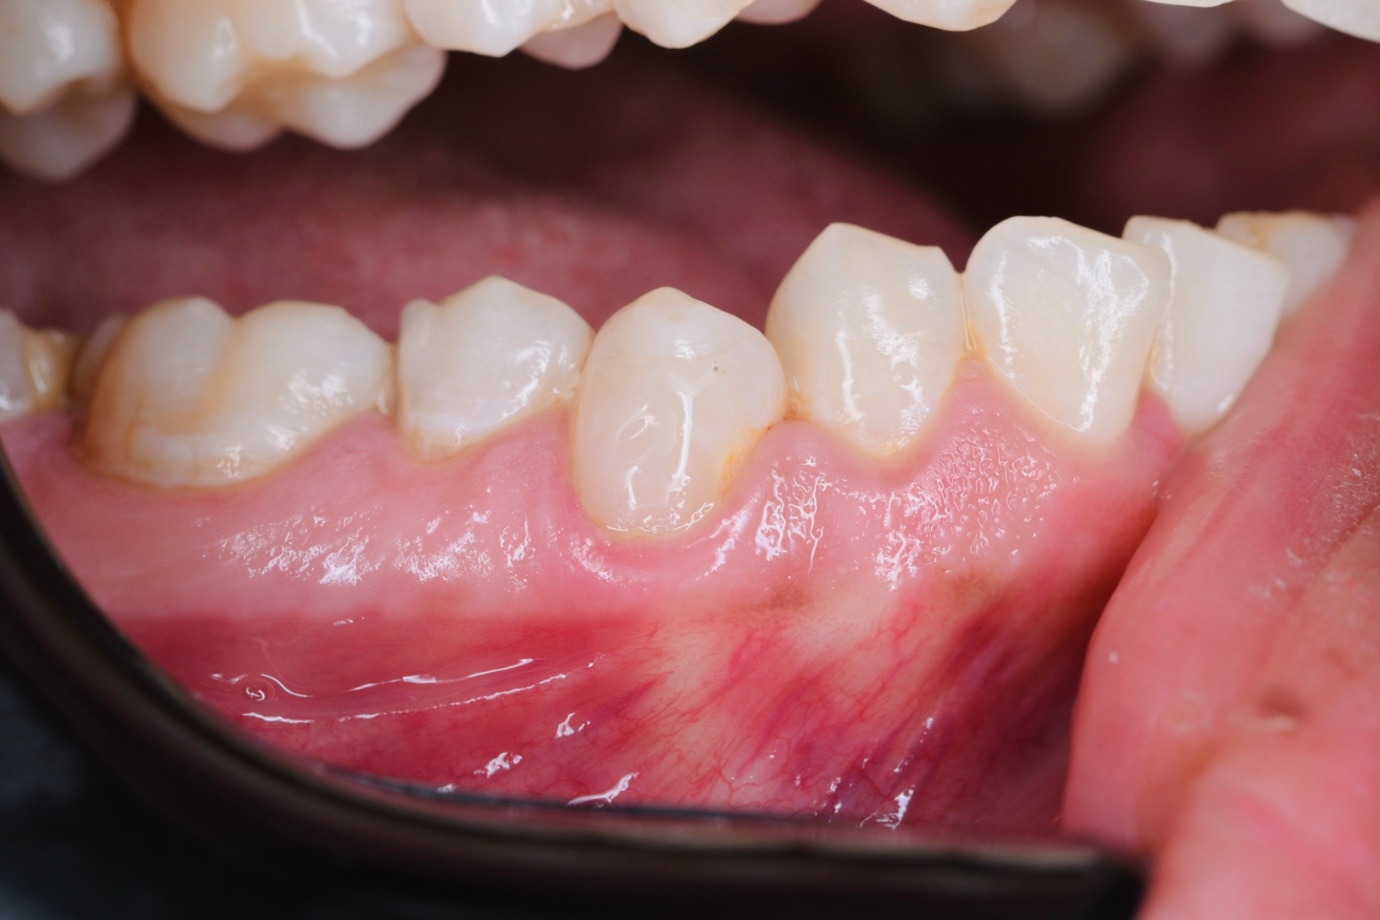


**B**

**A**

**B**

**Figure (5):** Follow up after 18 month. **A**: Beautifil flow plus X, **B:** ACTIVA bioactive.


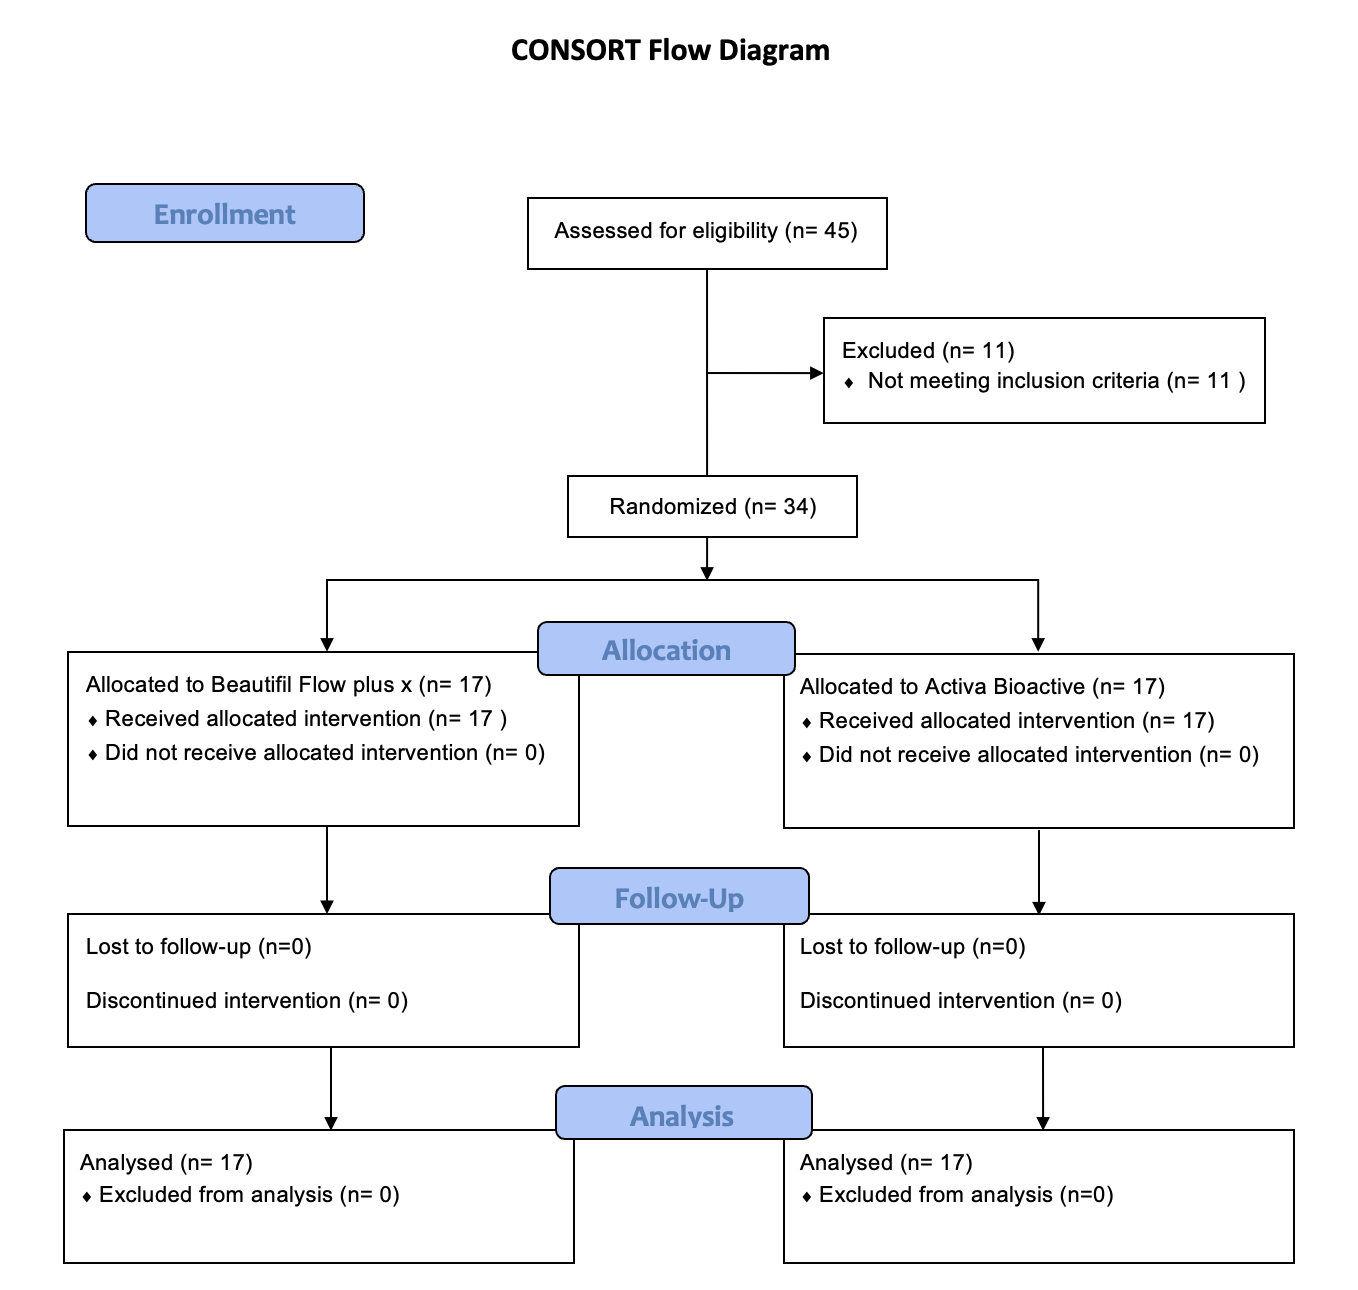


**Figure (6):** Participants Flow Diagram


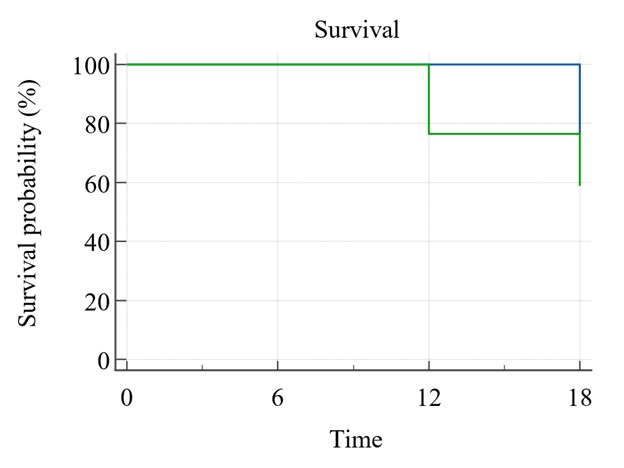


**Figure (7)**: Survival analysis of Activa and Beautifil for cervical restorations after 18 months
